# Supplementary material
Source: Springer Nature journal article supplement (https://www.springermedizin.de/resource/supplementary/12889_2013_5585_MOESM3_ESM.pdf/9495758)

24 weeks

31% participation

56% participation

81% participation

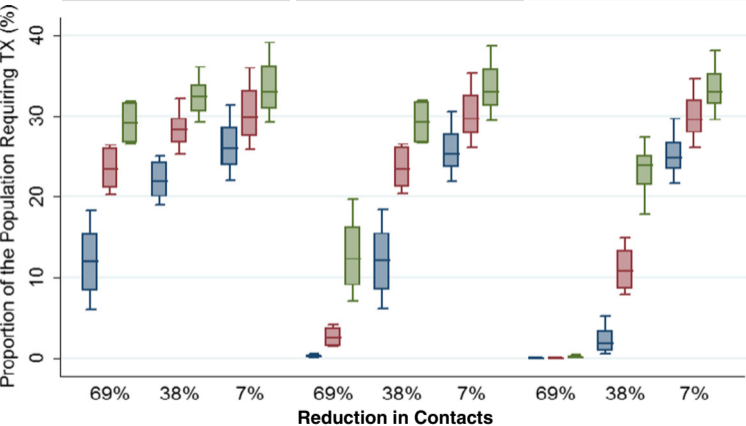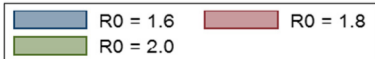

Supplement: MOESM3 [file 9495758]
